# Supplementary material
Source: bioRxiv or medRxiv preprint supplement (https://medrxiv.org/highwire/filestream/76223/field_highwire_adjunct_files/0/2020.04.09.20059550-1.pdf)
Supplement: Supplementary file [file 2020.04.09.20059550-1.pdf]

## Supplementary Materials

### **Diminishing Marginal Benefit of Social Distancing in Balancing COVID-19 Medical Demand-to-Supply**

**Authors:** Pai Liu, Payton Beeler, and Rajan K. Chakrabarty\*

**Author Affiliation:** Complex Aerosol Systems Research Laboratory, Washington University in St. Louis, St. Louis, MO-63130, USA

\*Address correspondence to R.K.C.: [chakrabarty@wustl.edu](mailto:chakrabarty@wustl.edu)

## Interstate Mobility Matrix

The matrix of passenger fluxes ( $\mathbf{P}$ ) was derived in the same manner as Brockmann and Helbing (1). Aviation data was first gathered from the United States Bureau of Transportation Statistics (2). This data included the number of passengers, origin, destination, and flight month. This information was sorted by month and arranged into an  $n \times m$  matrix containing the total number of passengers traveling from state  $n$  to state  $m$  (where in this case  $n=m=52$ ). The values stored within  $\mathbf{P}$  were then normalized by the total passenger flux to  $m$  ( $F_{nm}$ ), such that the value of  $\mathbf{P}$  gives the probability that a passenger arriving to state  $m$  originated in state  $n$ . The daily total passenger flux  $\phi$  of the air traffic network for each month is then calculated by taking the sum of  $F_{nm}$  and dividing by the number of days in the month.

## Ground Based Traffic Volume

The 1995 American Travel Survey (ATS) is the most recent available data regarding the movement of passengers from state to state via ground transportation. The ATS was conducted to gather information on household trips of over 100 miles. This data was used to estimate interstate passenger flux via ground transportation. When this data is compared with air traffic, it was found that the daily passenger flux of the ground traffic was less than 1% of the total passenger flux of air traffic.

## Time of Exposure Matrix

The time-of-exposure  $T_{ik}$  quantifies the mean time (per day, unit in minutes) that members in age group  $i$  is exposed to members in  $k$ . We obtained  $T_{ik}$  matrix data for American people from Ref (3) in which the  $T_{ik}$  statistics was derived from American Time Use Survey. Table S1 shows the  $T_{ik}$  matrix published in Ref (3)

**Table S1.** Average daily time of exposure between people in age-group  $k$  (column) and people in age-group  $i$  (row). (units: minutes per day).

|           | 0-4 years | 5-9 | 10-14 | 15-19 | 20-24 | 25-29 | 30-34 | 35-39 | 40-44 | 45-49 | 50-54 | 55-59 | 60-64 | 65-69 | 70-74 | 75-79 |
|-----------|-----------|-----|-------|-------|-------|-------|-------|-------|-------|-------|-------|-------|-------|-------|-------|-------|
| 0-4 years | 154       | 111 | 110   | 50    | 134   | 239   | 254   | 169   | 77    | 38    | 20    | 11    | 12    | 9     | 14    | 1     |
| 5-9       | 112       | 201 | 102   | 75    | 45    | 124   | 175   | 196   | 139   | 64    | 31    | 21    | 20    | 9     | 10    | 3     |
| 10-14     | 103       | 95  | 213   | 129   | 41    | 46    | 103   | 155   | 157   | 102   | 52    | 26    | 19    | 12    | 11    | 2     |
| 15-19     | 50        | 74  | 132   | 223   | 62    | 28    | 33    | 52    | 78    | 80    | 48    | 21    | 9     | 6     | 5     | 3     |
| 20-24     | 135       | 47  | 45    | 73    | 109   | 72    | 50    | 42    | 60    | 71    | 64    | 37    | 17    | 9     | 6     | 4     |
| 25-29     | 242       | 127 | 51    | 35    | 79    | 160   | 93    | 57    | 55    | 50    | 51    | 40    | 19    | 9     | 6     | 3     |
| 30-34     | 254       | 175 | 104   | 36    | 47    | 88    | 160   | 92    | 66    | 50    | 43    | 36    | 19    | 9     | 6     | 5     |
| 35-39     | 170       | 197 | 157   | 60    | 38    | 49    | 90    | 156   | 90    | 58    | 47    | 33    | 21    | 12    | 8     | 4     |
| 40-44     | 76        | 137 | 156   | 95    | 48    | 45    | 55    | 90    | 146   | 94    | 51    | 36    | 19    | 11    | 7     | 5     |
| 45-49     | 38        | 64  | 102   | 92    | 64    | 47    | 49    | 58    | 92    | 153   | 81    | 42    | 20    | 11    | 8     | 7     |
| 50-54     | 20        | 33  | 55    | 55    | 59    | 47    | 49    | 50    | 64    | 94    | 163   | 73    | 29    | 16    | 9     | 8     |
| 55-59     | 12        | 23  | 30    | 37    | 43    | 46    | 50    | 46    | 52    | 73    | 90    | 150   | 64    | 22    | 15    | 8     |
| 60-64     | 15        | 26  | 28    | 22    | 30    | 34    | 38    | 37    | 40    | 42    | 48    | 99    | 157   | 85    | 18    | 9     |
| 65-69     | 12        | 13  | 17    | 21    | 25    | 20    | 25    | 30    | 33    | 32    | 34    | 39    | 103   | 180   | 103   | 35    |
| 70-74     | 18        | 17  | 18    | 19    | 18    | 16    | 23    | 20    | 30    | 44    | 24    | 28    | 41    | 103   | 222   | 102   |
| 75-79     | 3         | 4   | 4     | 14    | 10    | 10    | 13    | 18    | 22    | 26    | 18    | 21    | 15    | 39    | 141   | 173   |

In Table S1, age groups are stratified with five years increment. We next calculated a  $T_{ik}$  matrix with age-groups stratified with ten years by taking the average values for the neighboring 2-by-2 elements in Table S1. This calculation can be generically expressed as:

$$T_{i:i+9,k:k+9} = \frac{1}{4} (T_{i:i+4,k:k+4} + T_{i+5:i+9,k:k+4} + T_{i:i+4,k+5:k+9} + T_{i+5:i+9,k+5:k+9}). \quad (S1)$$

Here, the  $i:i+9$  in subscript denotes “between  $i$  and  $i+9$  years”. The calculation results are outlined in Table S2.

**Table S2.** Average daily time of exposure between people in age-group  $k$  (column) and people in age-group  $i$  (row). Age groups are stratified with ten years increments (units: minutes per day).

|           | 0-9 years | 10-19  | 20-29 | 30-39 | 40-49  | 50-59 | 60-69  | 70-79 |
|-----------|-----------|--------|-------|-------|--------|-------|--------|-------|
| 0-9 years | 144.5     | 84.25  | 135.5 | 198.5 | 79.5   | 20.75 | 12.5   | 7     |
| 10-19     | 80.5      | 174.25 | 44.25 | 85.75 | 104.25 | 36.75 | 11.5   | 5.25  |
| 20-29     | 137.75    | 51     | 105   | 60.5  | 59     | 48    | 13.5   | 4.75  |
| 30-39     | 199       | 89.25  | 55.5  | 124.5 | 66     | 39.75 | 15.25  | 5.75  |
| 40-49     | 78.75     | 111.25 | 51    | 63    | 121.25 | 52.5  | 15.25  | 6.75  |
| 50-59     | 22        | 44.25  | 48.75 | 48.75 | 70.75  | 119   | 32.75  | 10    |
| 60-69     | 16.5      | 22     | 27.25 | 32.5  | 36.75  | 55    | 131.25 | 41.25 |
| 70-79     | 10.5      | 13.75  | 13.5  | 18.5  | 30.5   | 22.75 | 49.5   | 159.5 |

Subsequently, the age-specific  $R_{0,n,i}$  was calculated for age-groups 1-8 (comprising all people aged between 0 to 79 years), using the  $T_{ik}$  outlined in Table S2. We further assumed a  $R_{0,n,9} = R_{0,n,8}$  based on the presumption that people in age-group 9 (those aged 80 years and above) have the same social contact pattern as those in age-group 8 (those aged between 70 and 79 years).

### **Model Calibration Period**

Figure S1 shows the confirmed active cases of COVID-19 in the United States during the period between March 10 and April 7. A distinct inflection point in the epidemic trend can be observed around March 28. Such an inflection is characterized with a transition from a steep increasing trend (between March 19 and 28, shaded regime in Fig. S1) of confirmed active cases to a less steep one (after March 28). The slowing down of the increasing trend could be due to the country wide social distancing practices implemented in March have taken effect. We therefore assumed that the growth dynamics observed between March 19 and 28 actually represent a baseline scenario without social distancing intervention in effect.

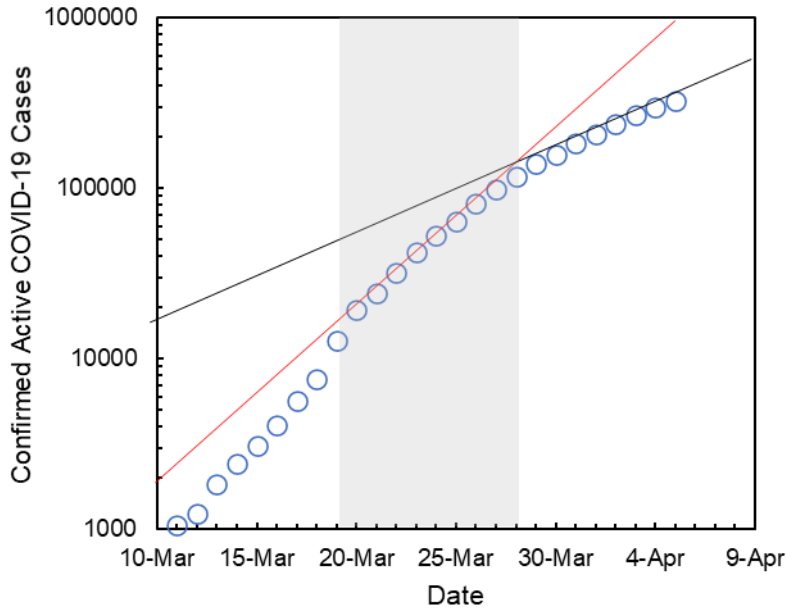

**Figure S1.** Daily confirmed active COVID-19 cases in the United States between March 10 and April 7.

**Inference Results**

Table S3 outlines the inference results for the state-wise basic reproduction ratio  $R_{0,n}$ , the local documentation-to-infected ratio  $\eta_n$ , documentation-to-exposed ratio  $\zeta_n$ , and the root-mean-squared-error (RMSE) between the best-fit model prediction and the ground truth.

Figure S2 shows the comparison between the state-wise daily observation of documented COVID-19 cases (circle) and the best-fit model prediction (line), along with the corresponding combination of  $\zeta_n$  and  $\eta_n$  that gives rise to the minimum RMSE.

**Table S3.** State-wise epidemiological parameters inferred from the observational epidemic trends between March 19 and March 28

| State | $R_0$ | $\eta$ | $\zeta$ | RMSE    |
|-------|-------|--------|---------|---------|
| AL    | 5.08  | 0.7    | 0.3     | 6/24/20 |
| AK    | 3.99  | 0.8    | 0.3     | 6/3/20  |
| AZ    | 5.99  | 0.5    | 0.1     | 6/15/20 |
| AR    | 3.08  | 1      | 0.3     | 6/24/20 |
| CA    | 4.05  | 0.4    | 0.2     | 6/8/20  |
| CO    | 4.02  | 0.8    | 0.3     | 6/18/20 |
| CT    | 4.08  | 1      | 0.2     | 6/25/20 |
| DE    | 3.99  | 1      | 0.4     | 6/20/20 |
| FL    | 5.08  | 0.7    | 0.3     | 6/18/20 |
| GA    | 4.08  | 0.8    | 0.3     | 6/18/20 |
| HI    | 3.08  | 0.9    | 0.2     | 6/12/20 |
| ID    | 5.05  | 0.7    | 0.1     | 6/11/20 |
| IL    | 4.99  | 0.3    | 0.1     | 6/16/20 |
| IN    | 6.99  | 0.7    | 0.2     | 6/21/20 |
| IA    | 4.04  | 0.8    | 0.3     | 6/24/20 |
| KS    | 4.01  | 1      | 0.7     | 6/21/20 |
| KY    | 4.08  | 0.7    | 0.2     | 6/24/20 |
| LA    | 4.08  | 0.9    | 0.3     | 6/21/20 |
| ME    | 2.99  | 0.9    | 0.5     | 6/23/20 |
| MD    | 5.03  | 0.5    | 0.2     | 6/21/20 |
| MA    | 6.99  | 0.7    | 0.6     | 6/17/20 |
| MI    | 3.99  | 1      | 0.2     | 6/20/20 |
| MN    | 2.99  | 0.8    | 0.3     | 6/19/20 |
| MS    | 4.06  | 1      | 0.2     | 6/25/20 |
| MO    | 7.03  | 0.6    | 0.1     | 6/21/20 |
| MT    | 6.02  | 0.5    | 0.2     | 6/14/20 |
| NE    | 2.08  | 0.9    | 0.4     | 6/21/20 |
| NV    | 4.05  | 0.5    | 0.2     | 6/13/20 |
| NH    | 3.03  | 0.9    | 0.4     | 6/8/20  |
| NJ    | 6.02  | 0.8    | 0.3     | 6/20/20 |
| NM    | 3.99  | 0.6    | 0.4     | 6/19/20 |
| NY    | 4.05  | 0.5    | 0.1     | 6/8/20  |
| NC    | 4.08  | 0.4    | 0.1     | 6/19/20 |
| ND    | 3.99  | 0.4    | 0.2     | 6/25/20 |
| OH    | 3.99  | 0.9    | 0.2     | 6/22/20 |
| OK    | 6.05  | 0.6    | 0.8     | 6/23/20 |
| OR    | 4.08  | 0.7    | 0.5     | 6/8/20  |
| PA    | 6.99  | 0.3    | 0.1     | 6/21/20 |
| RI    | 3.00  | 0.8    | 0.2     | 6/6/20  |
| SC    | 3.06  | 1      | 0.2     | 6/23/20 |
| SD    | 3.99  | 0.7    | 0.3     | 6/24/20 |
| TN    | 4.04  | 0.8    | 0.2     | 6/18/20 |
| TX    | 4.99  | 0.3    | 0.1     | 6/18/20 |
| UT    | 4.07  | 0.4    | 0.1     | 6/16/20 |
| VT    | 3.99  | 1      | 0.3     | 6/20/20 |
| VA    | 3.99  | 0.9    | 0.4     | 6/23/20 |
| WA    | 2.99  | 0.2    | 0.1     | 5/27/20 |
| WV    | 7.99  | 0.8    | 0.1     | 6/25/20 |
| WI    | 3.02  | 1      | 0.3     | 6/22/20 |
| WY    | 5.08  | 0.1    | 0.1     | 6/25/20 |
| DC    | 4.00  | 0.6    | 0.2     | 6/20/20 |
| PR    | 4.99  | 0.7    | 0.1     | 6/22/20 |

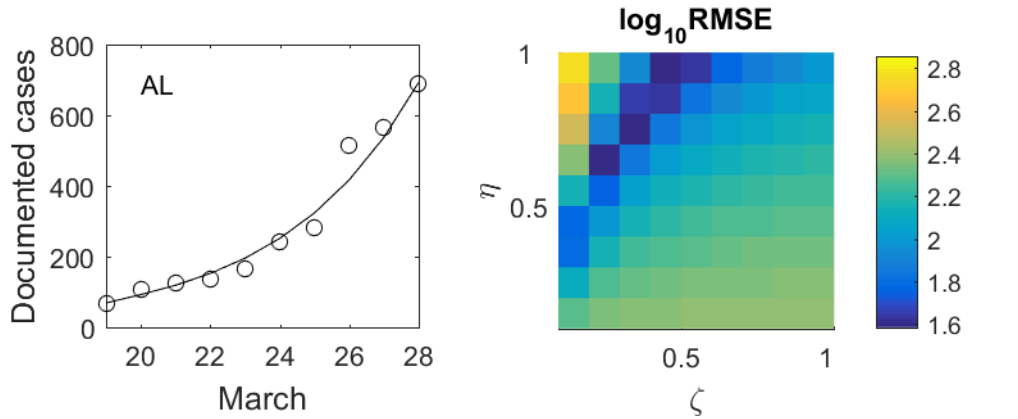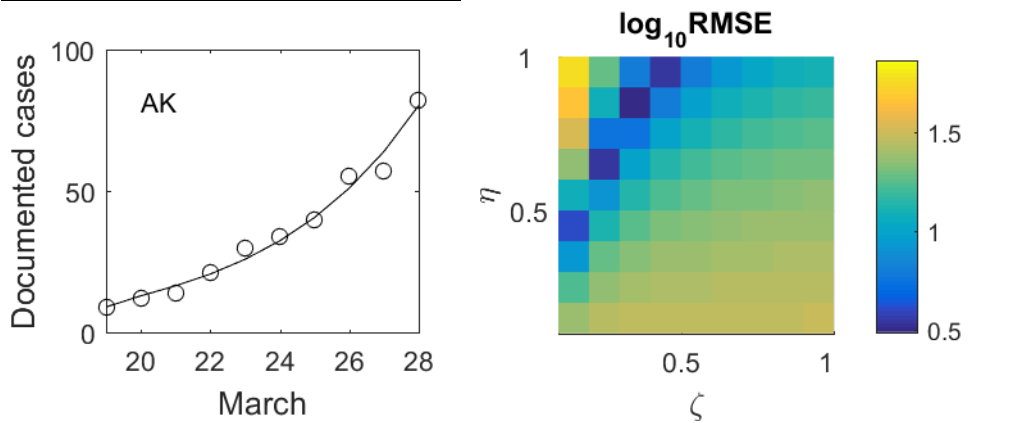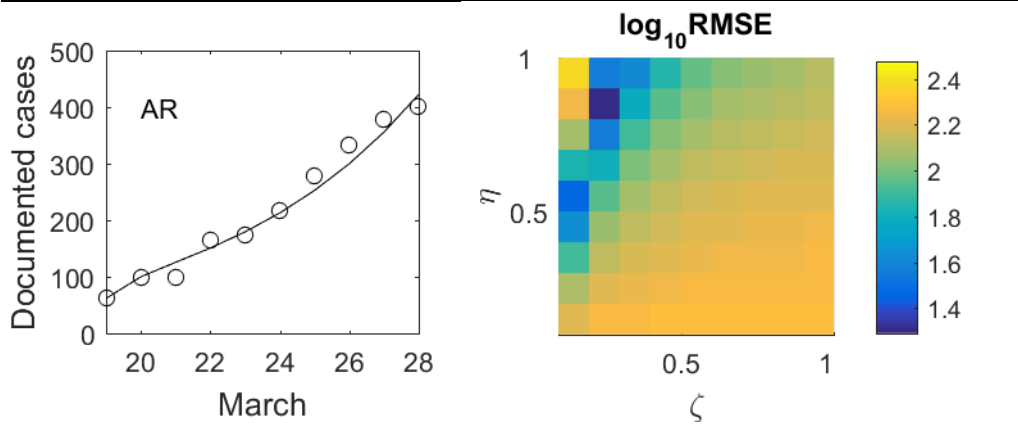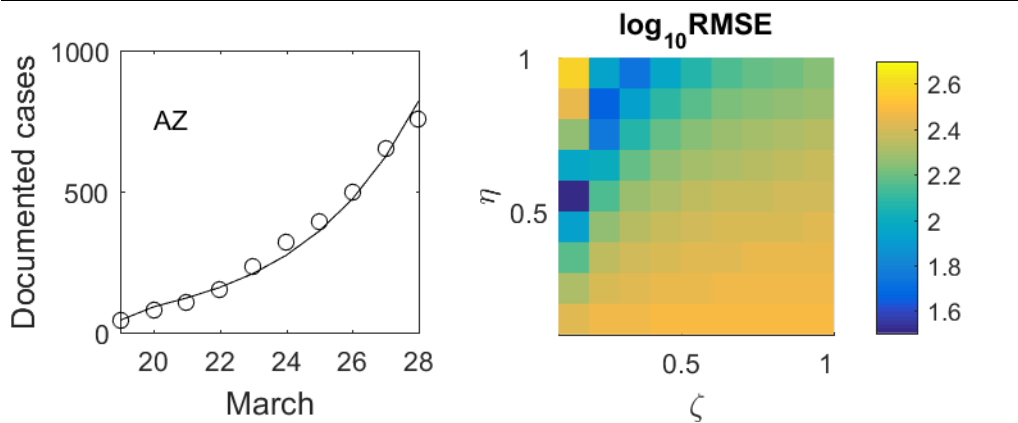

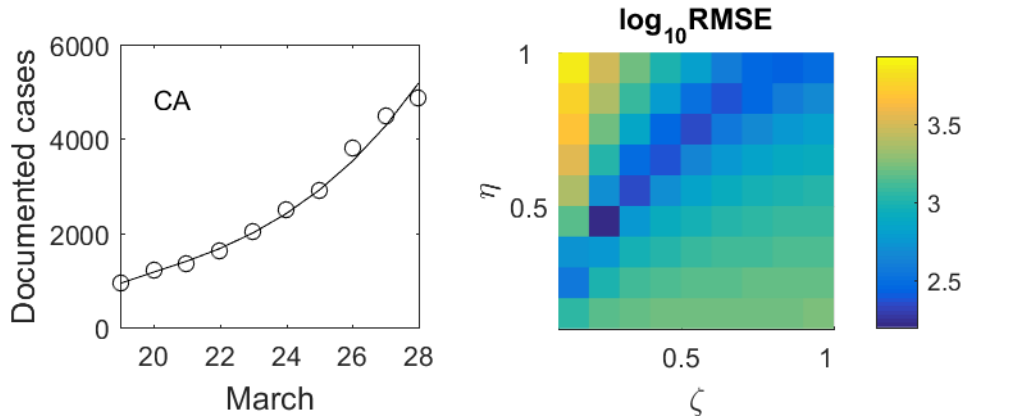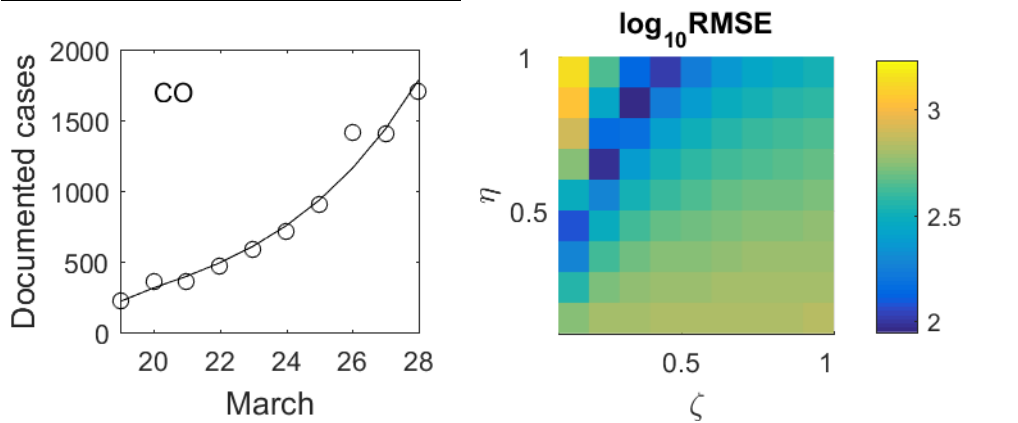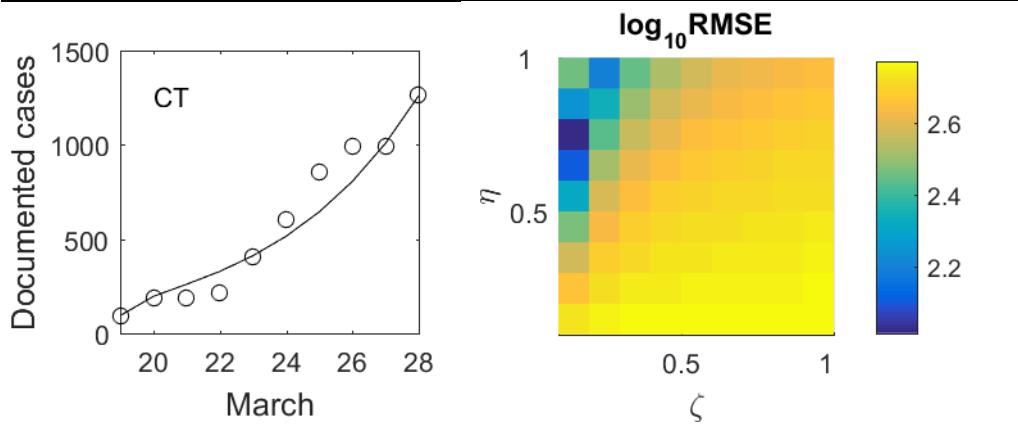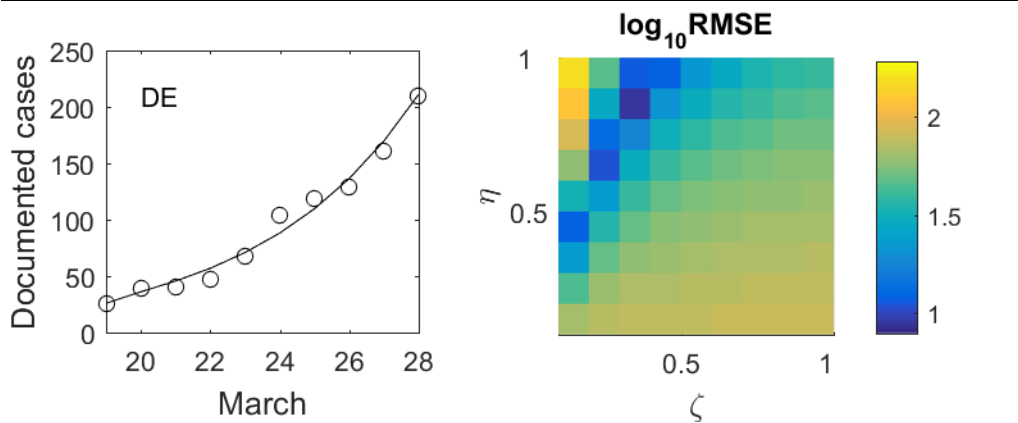

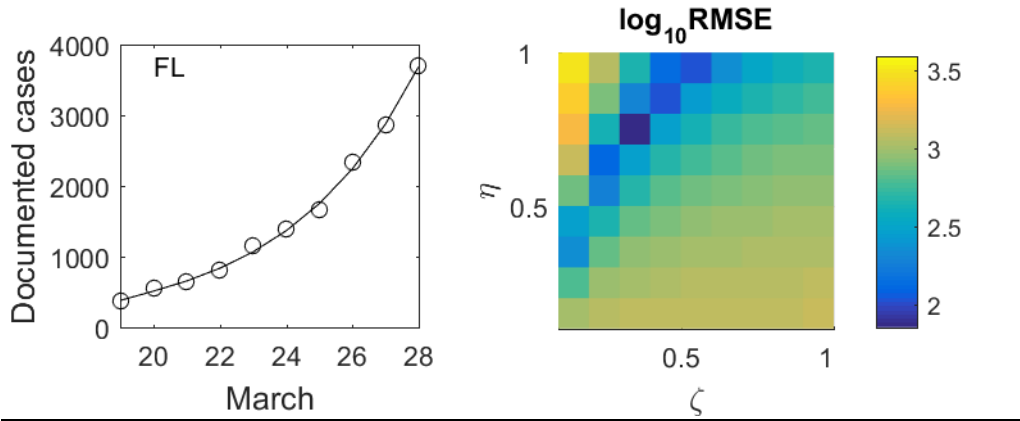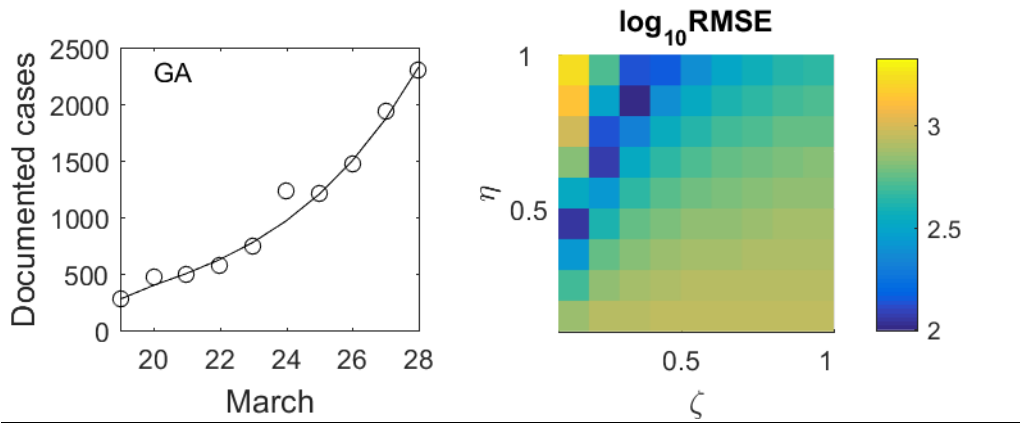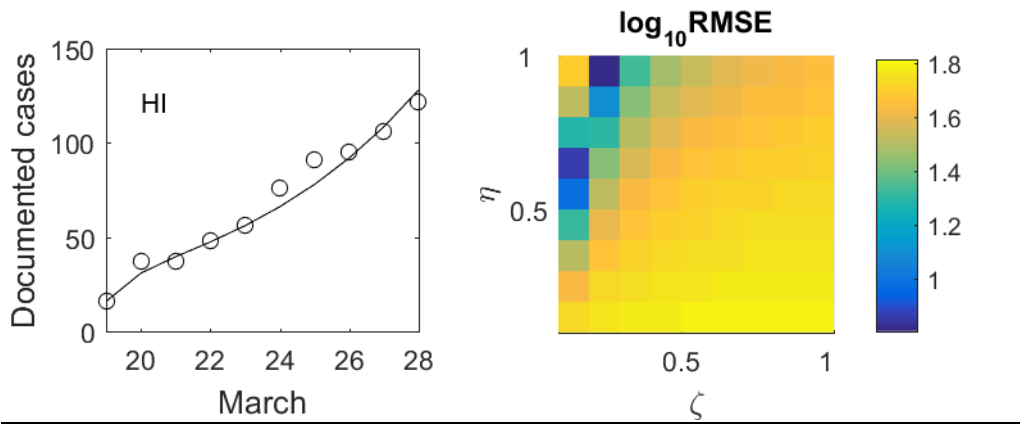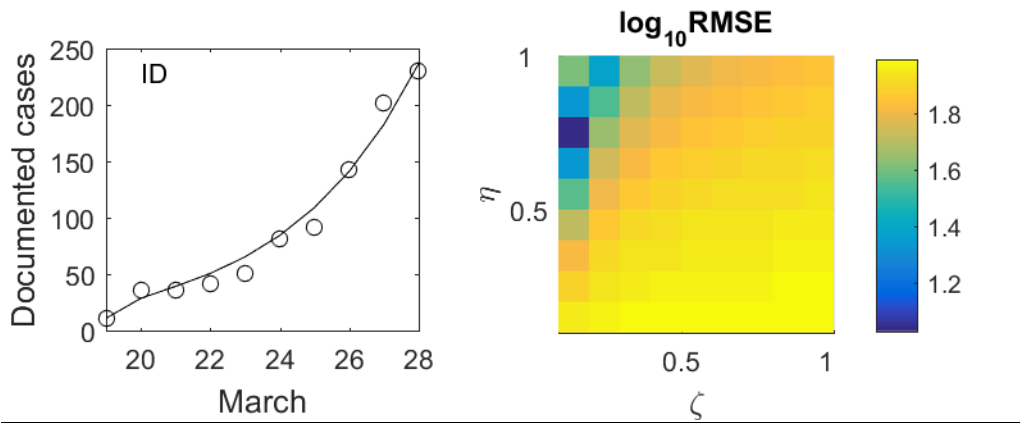



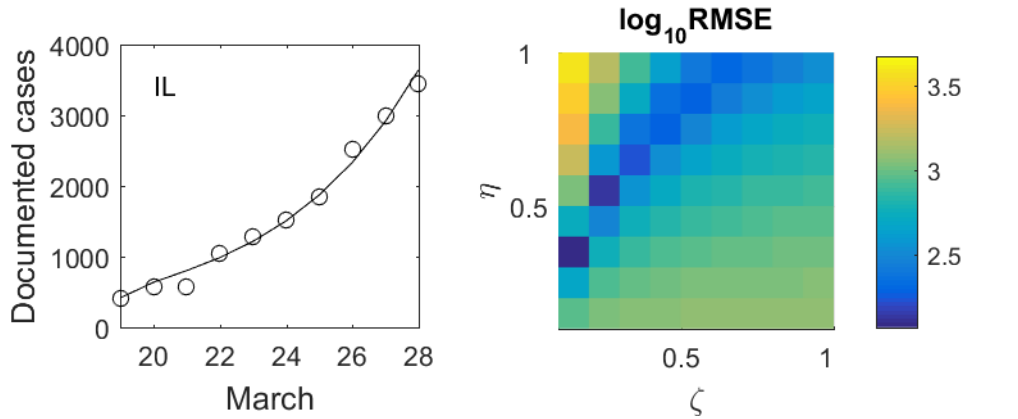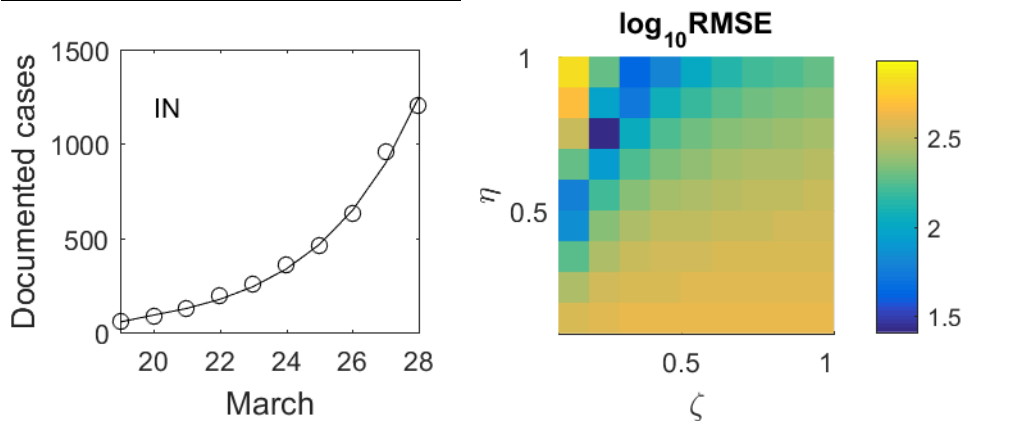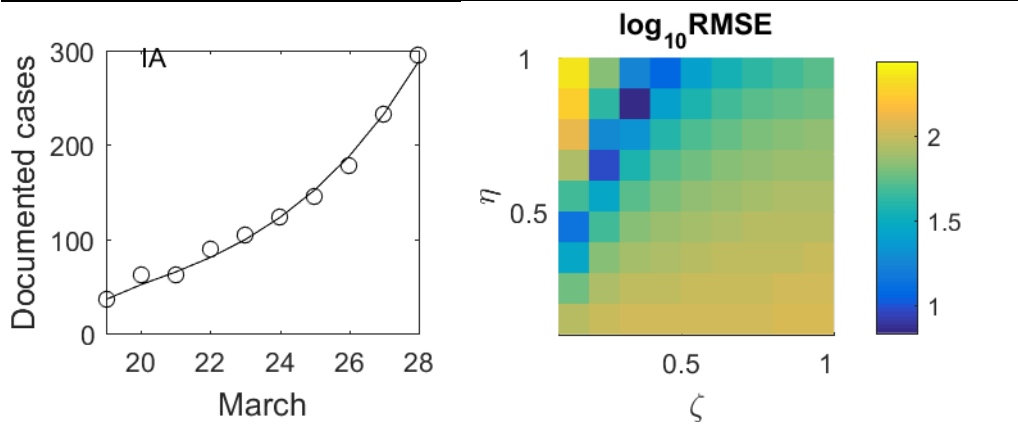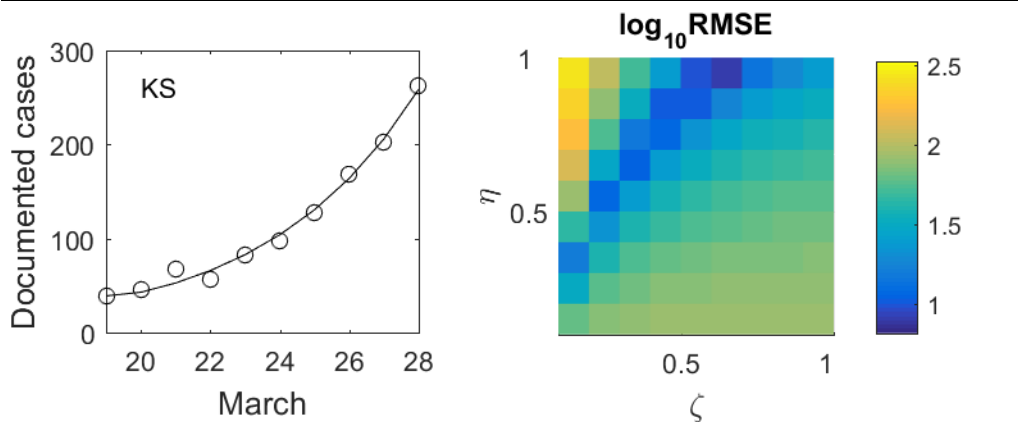

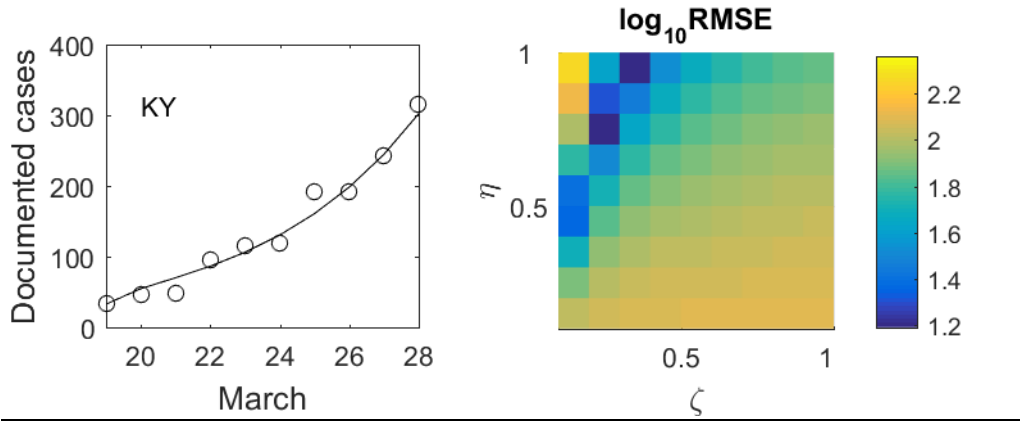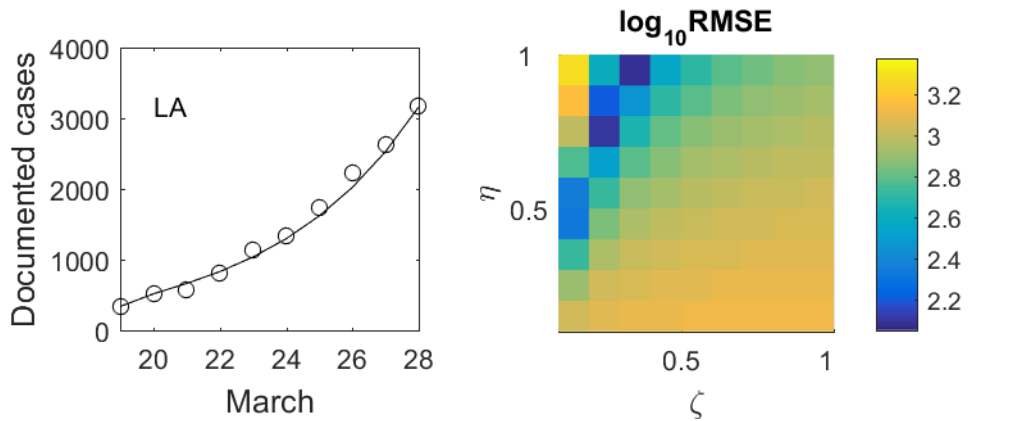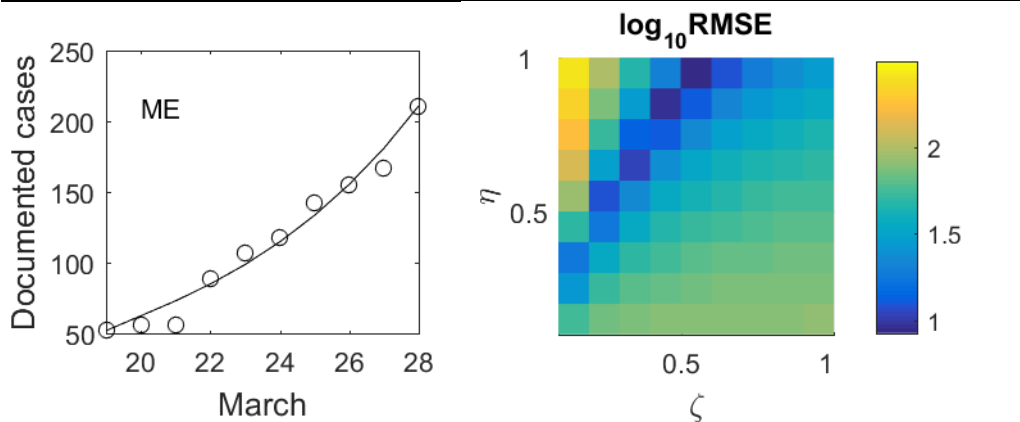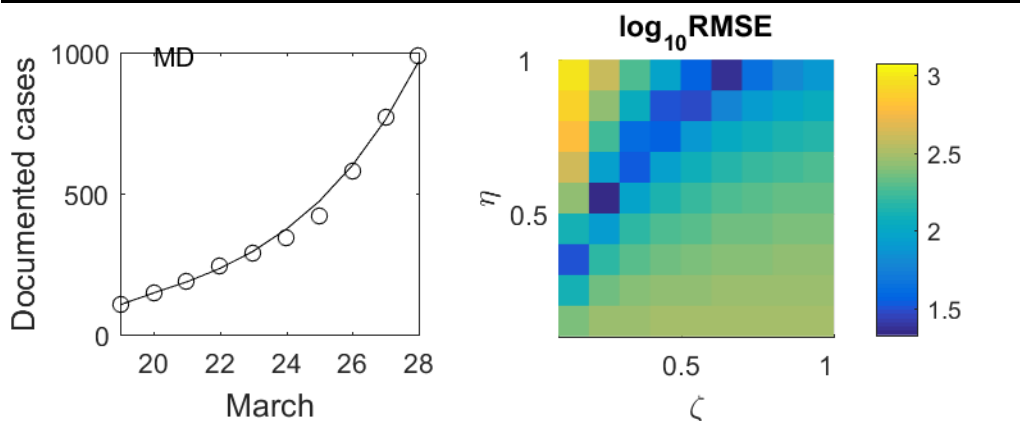

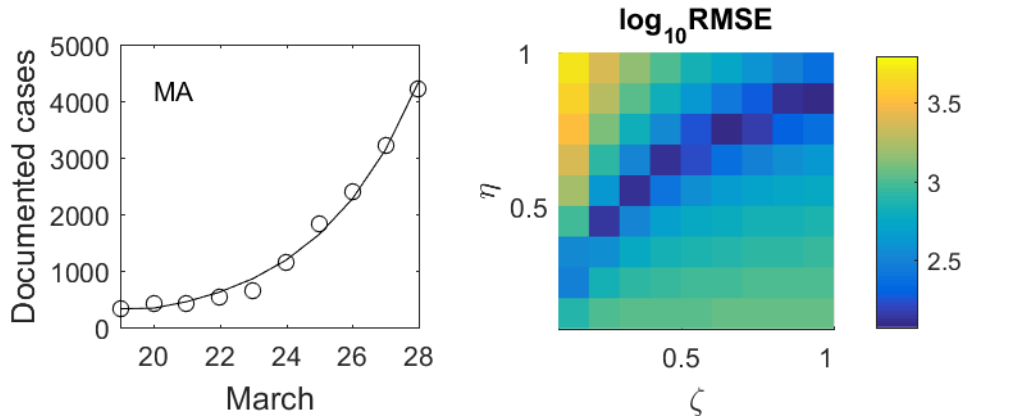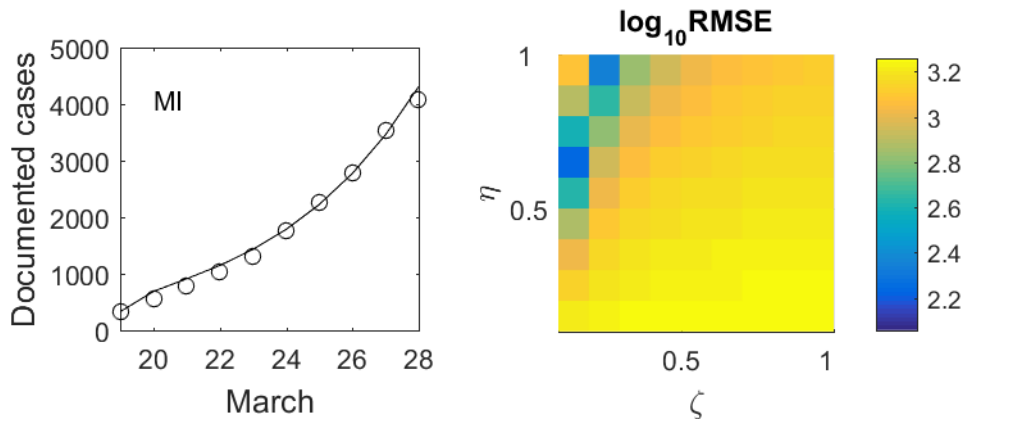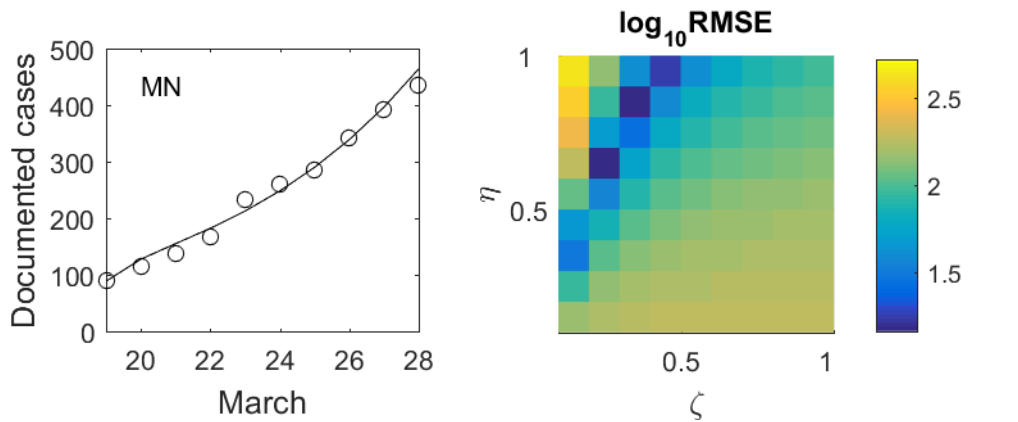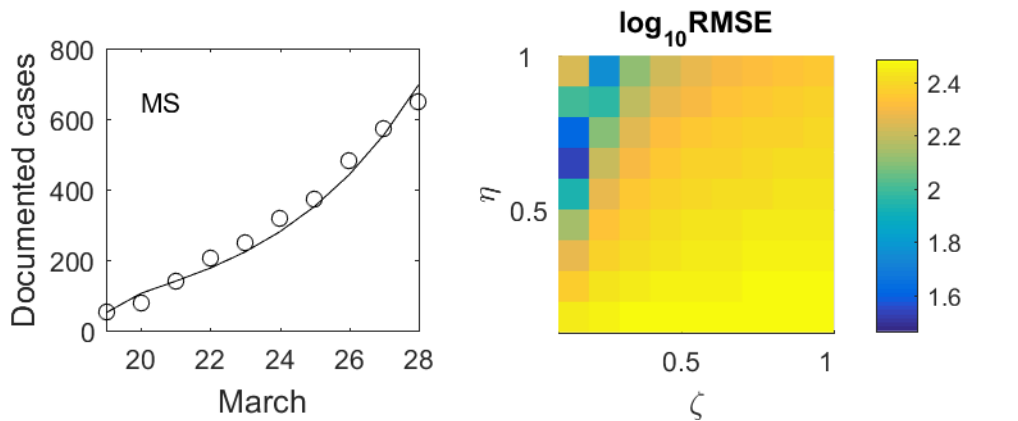

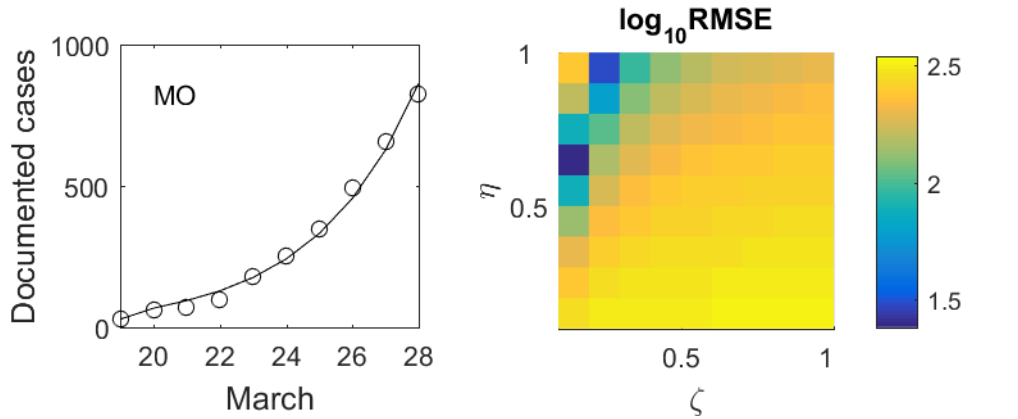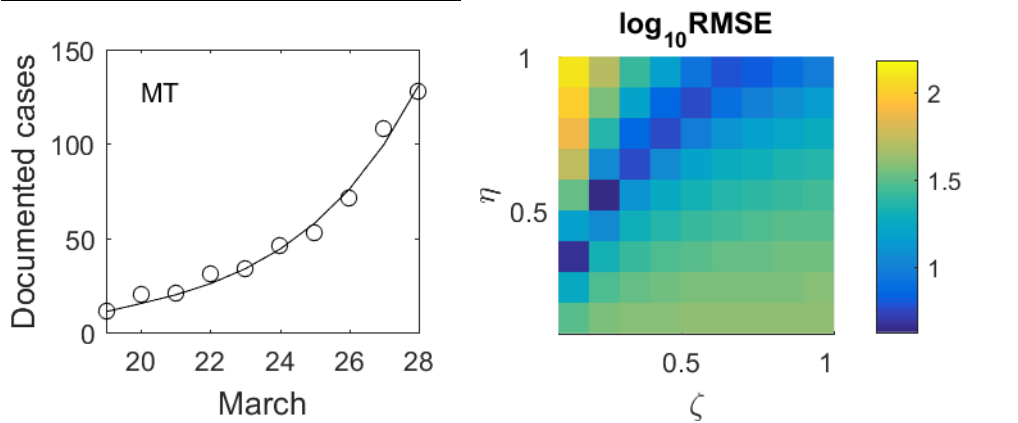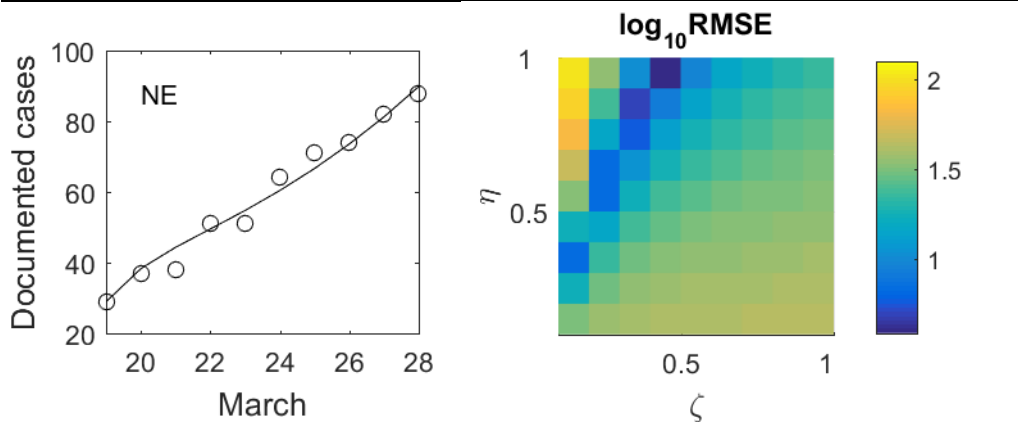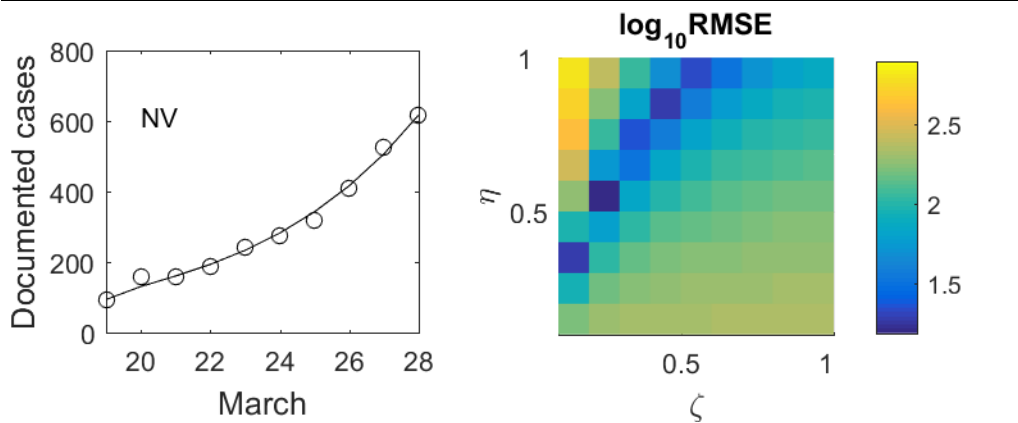

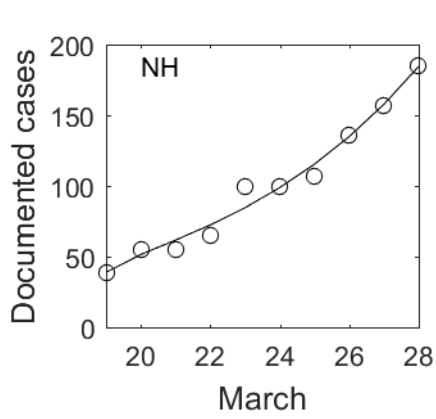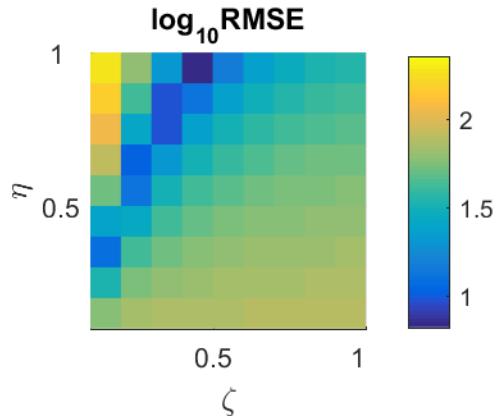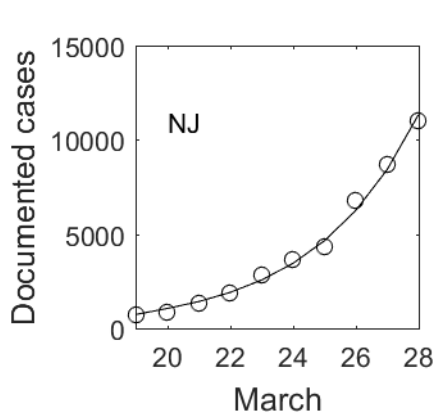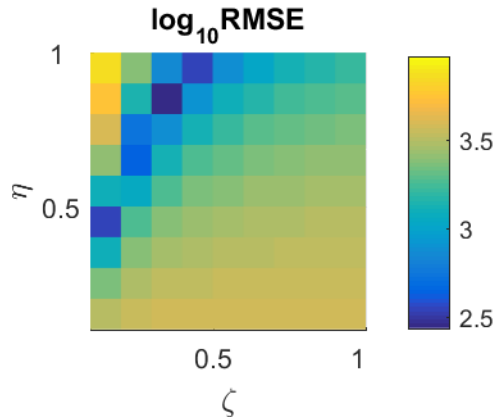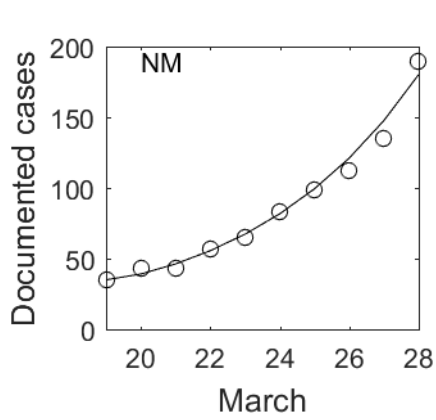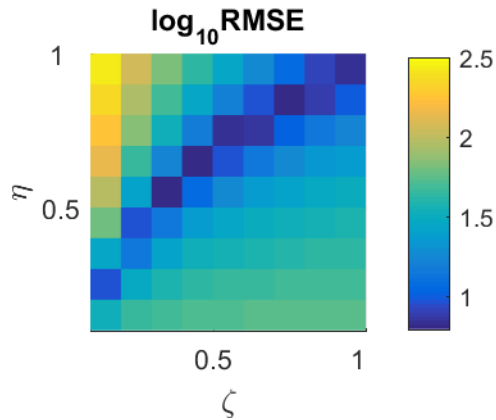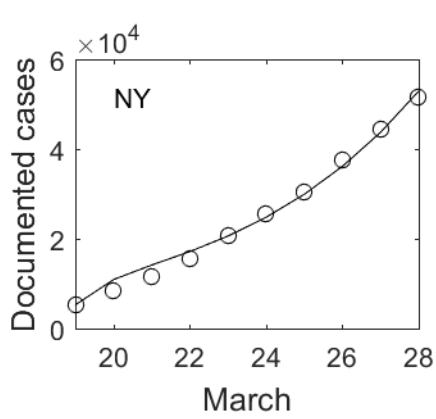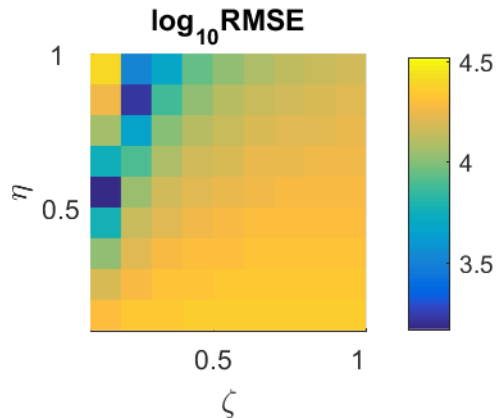

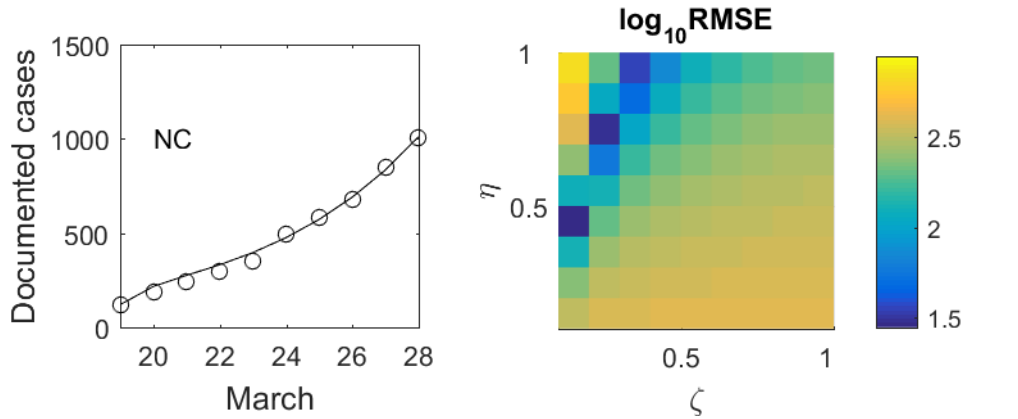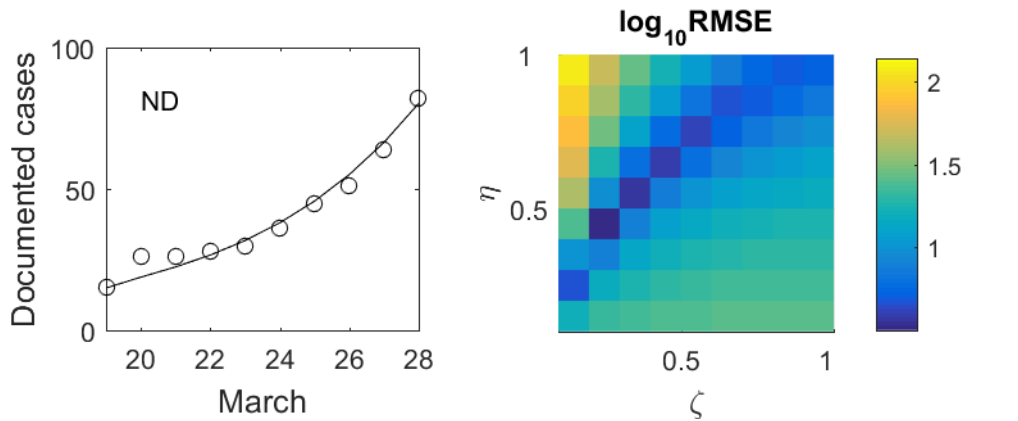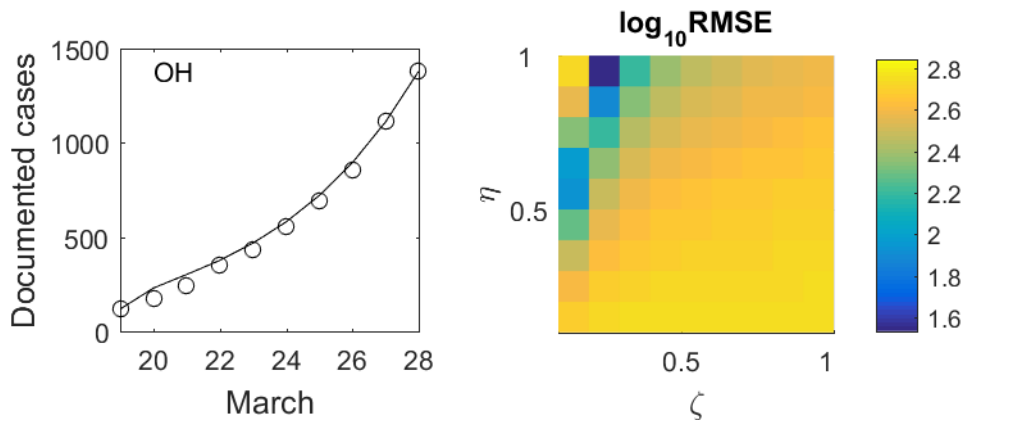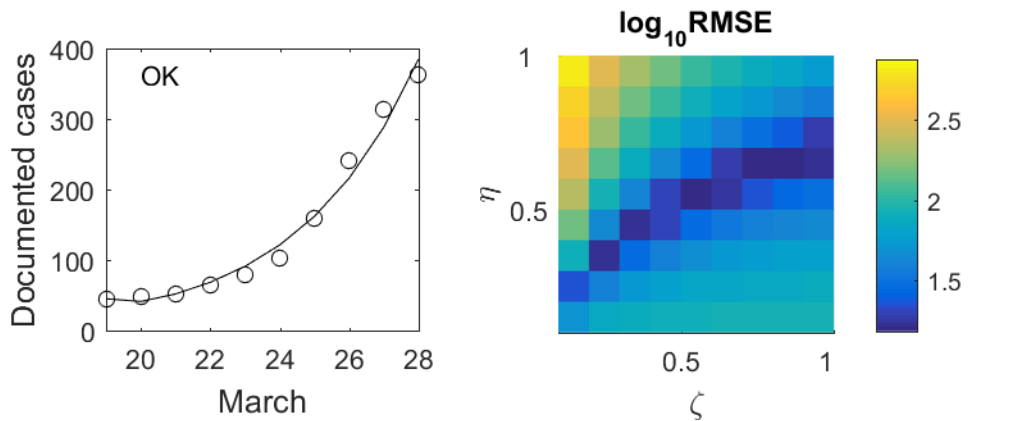

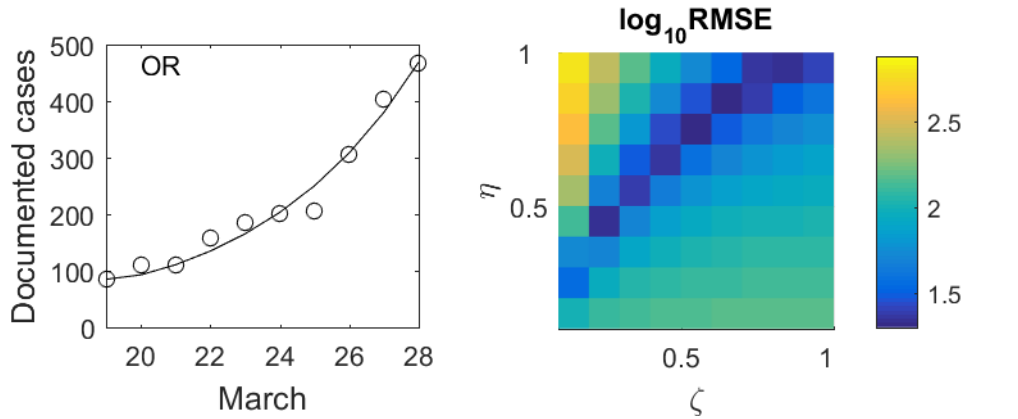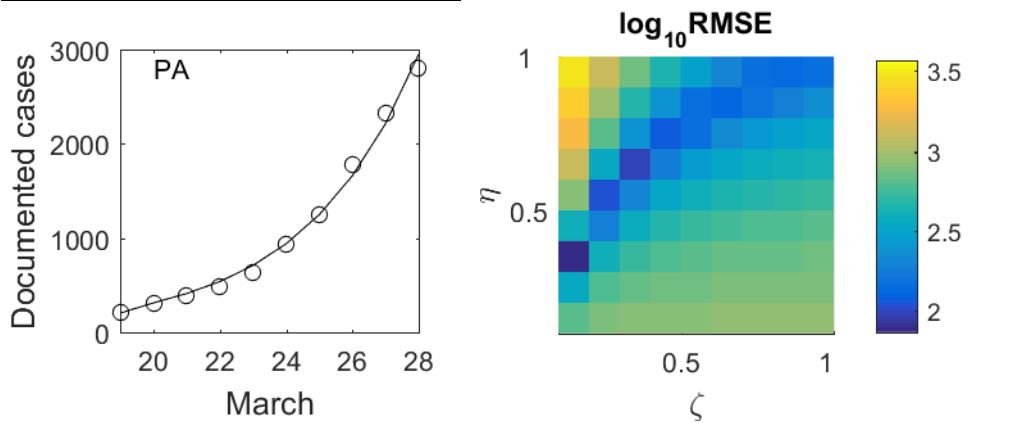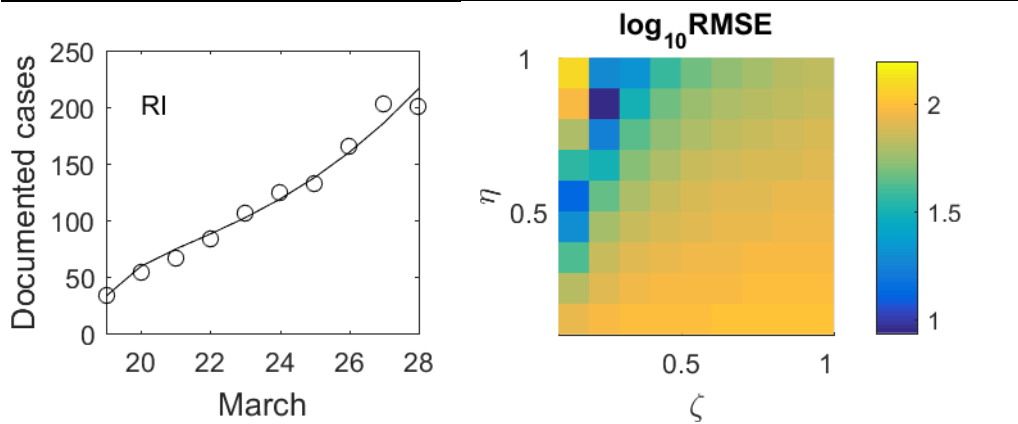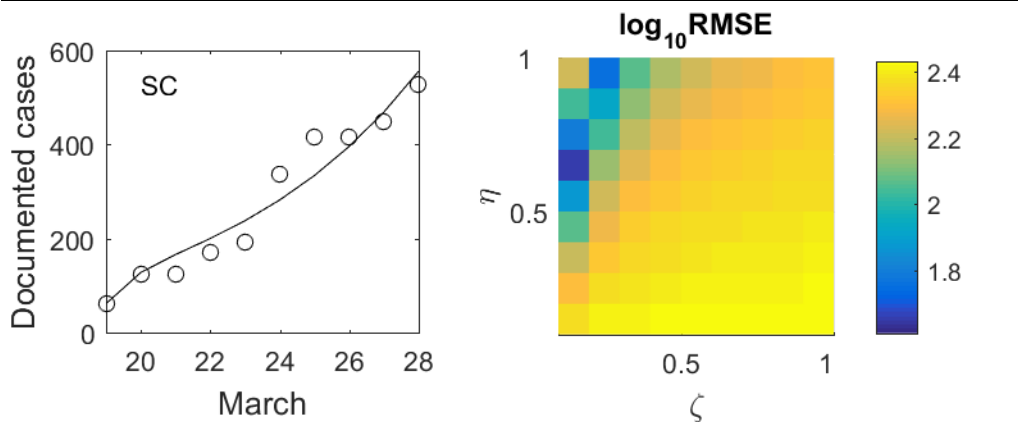

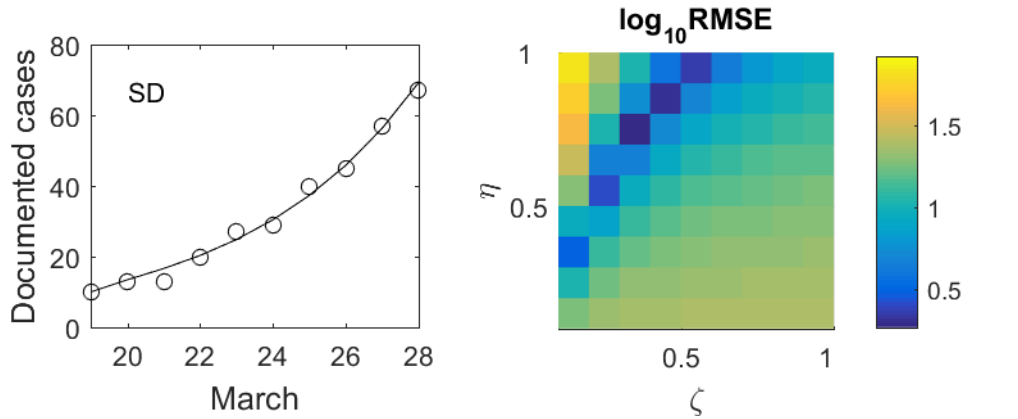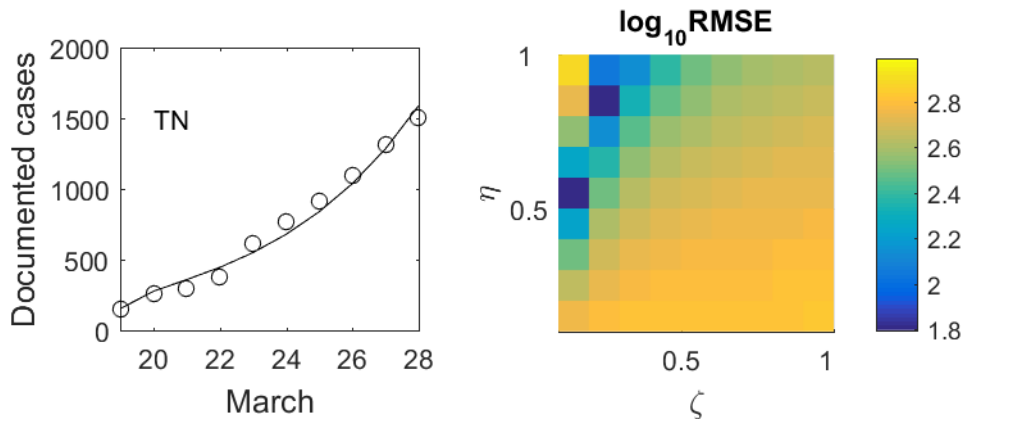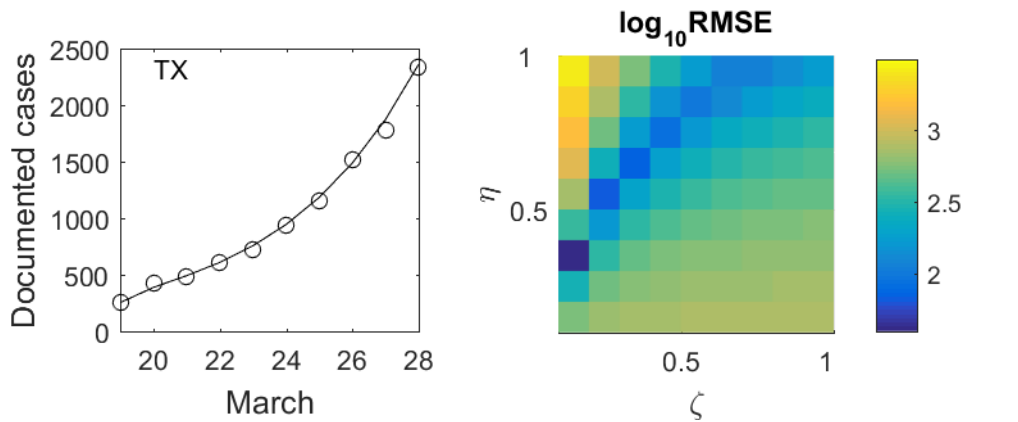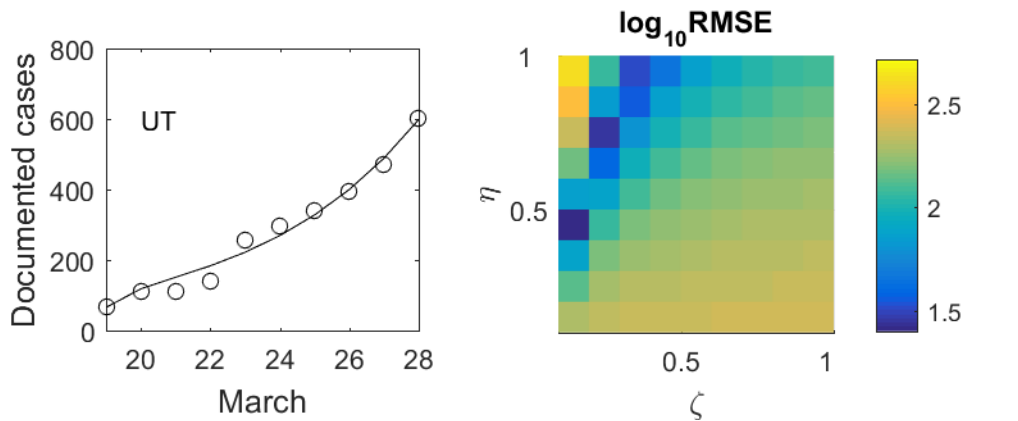



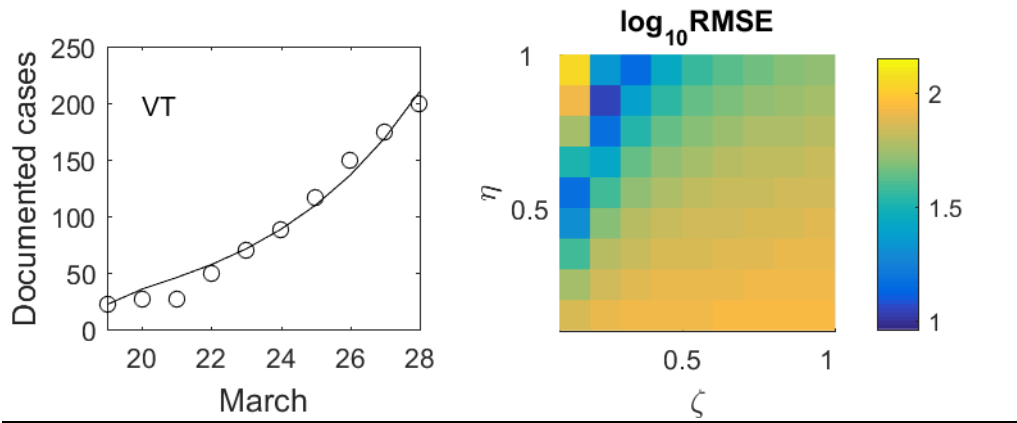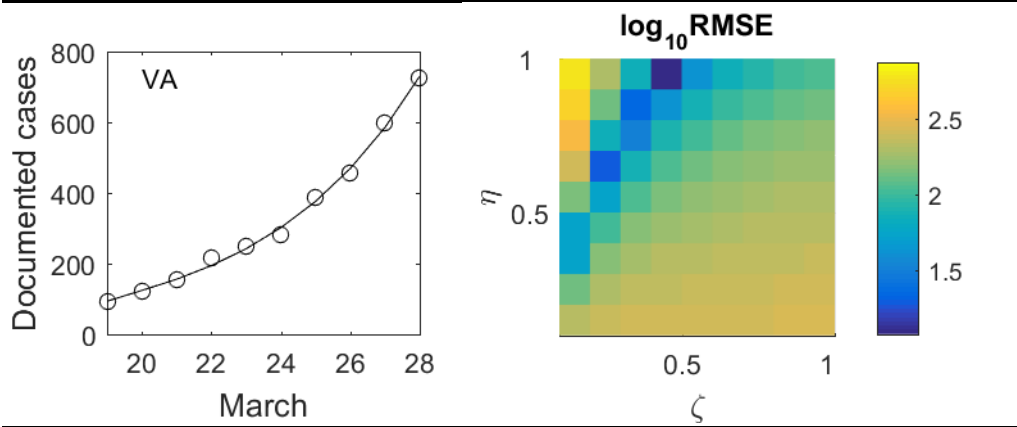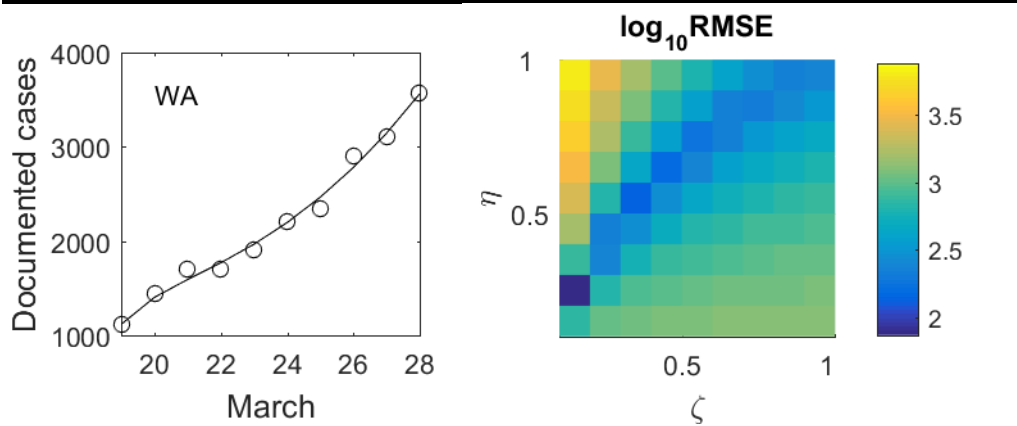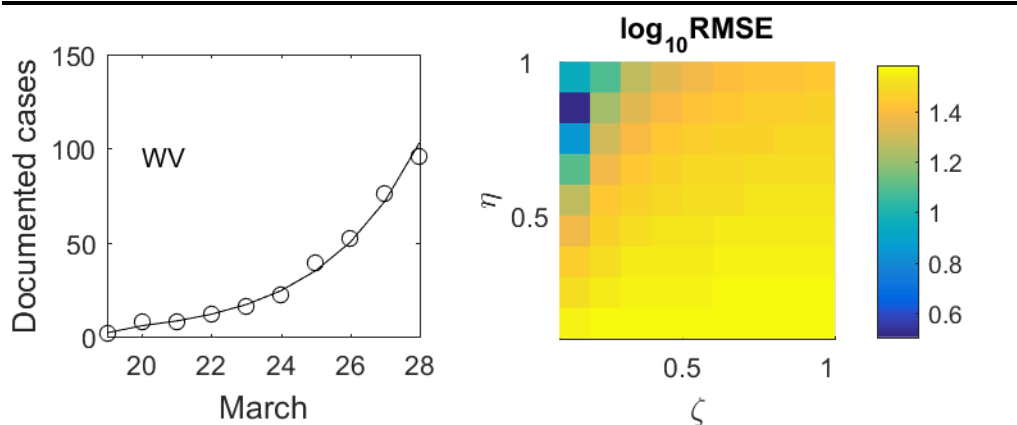

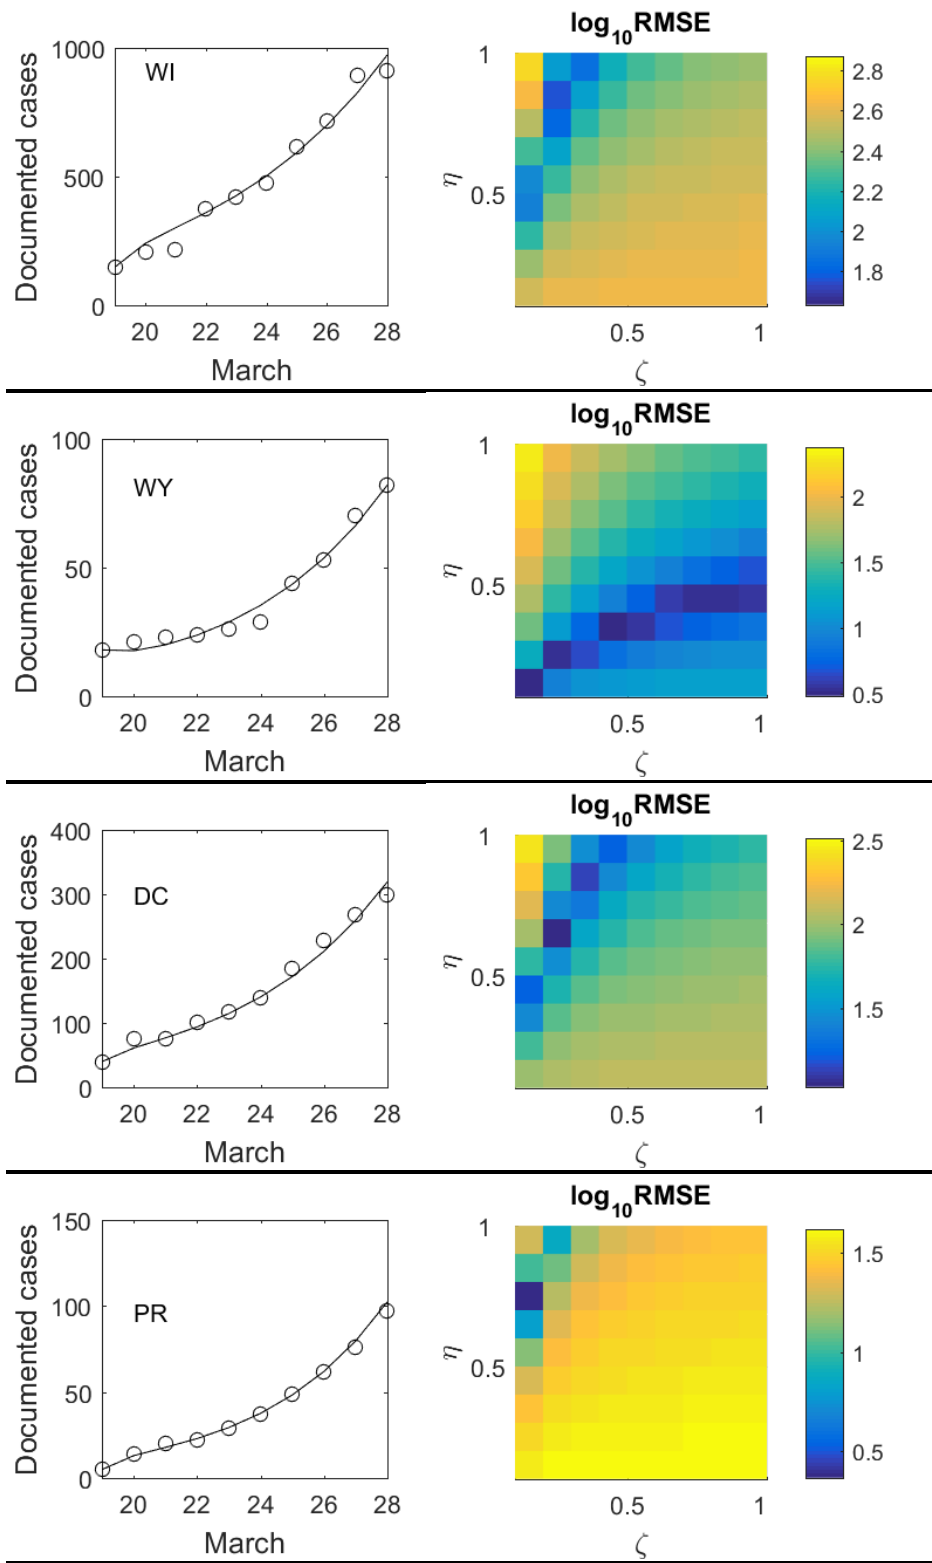

Figure S2. Daily observation of documented active COVID-19 cases (circle) is compared with the best-fit model (line). The color maps show the corresponding combination of  $\zeta$  and  $\eta$  that gives rise to the minimum RMSE

### **Age-Specific Hospitalization and Critical Condition Rate**

The age-specific hospitalization rate ( $P_{H,i}$ ) and critical condition rate ( $P_{ICU,i}$ ) of COVID-19 patients are obtained from the work by Ferguson et al. 2020 (4). Values for  $P_{H,i}$  and  $P_{ICU,i}$  are outlined in table S4.

**Table S4.** Age-specific hospitalization rate ( $P_{H,i}$ ) and critical condition rate  $P_{ICU,i}$  of COVID-19 patients

| age group (years) | $P_{H,i}$ | $P_{ICU,i}$ |
|-------------------|-----------|-------------|
| 0-9               | 0.001     | 0.05        |
| 10-19             | 0.003     | 0.05        |
| 20-29             | 0.012     | 0.05        |
| 30-39             | 0.032     | 0.05        |
| 40-49             | 0.049     | 0.063       |
| 50-59             | 0.102     | 0.122       |
| 60-69             | 0.166     | 0.274       |
| 70-79             | 0.243     | 0.432       |
| 80 and above      | 0.273     | 0.709       |

### **State-Wise Statistics:**

Table S5 shows the state-wise population ( $N_n$ ) and demographic composition ( $f_{n,i}$ ). These datasets are obtained from the United States Census Bureau (5).

Table S6 outlines the state-wise number of hospital beds ( $X_{H,n}$ ) and ICU beds ( $X_{ICU,n}$ ). These numbers are obtained from the database of the Harvard Global Health Institute (6).

**Table S5. State-wise population and demographic composition**

| State | Population | Fraction<br>of aged<br>0-9<br>years | 10-19<br>years | 20-29<br>years | 30-39<br>years | 40-49<br>years | 50-59<br>years | 60-69<br>years | 70-79<br>years | 80<br>years<br>and<br>above |
|-------|------------|-------------------------------------|----------------|----------------|----------------|----------------|----------------|----------------|----------------|-----------------------------|
| AL    | 4903185    | 0.1209                              | 0.1281         | 0.1361         | 0.1243         | 0.1230         | 0.1332         | 0.1205         | 0.0752         | 0.0385                      |
| AK    | 731545     | 0.1426                              | 0.1302         | 0.1555         | 0.1476         | 0.1173         | 0.1272         | 0.1091         | 0.0507         | 0.0197                      |
| AZ    | 7278717    | 0.1238                              | 0.1325         | 0.1409         | 0.1292         | 0.1190         | 0.1200         | 0.1135         | 0.0803         | 0.0408                      |
| AR    | 3017804    | 0.1273                              | 0.1322         | 0.1354         | 0.1267         | 0.1198         | 0.1270         | 0.1158         | 0.0759         | 0.0400                      |
| CA    | 39512223   | 0.1246                              | 0.1288         | 0.1476         | 0.1434         | 0.1281         | 0.1270         | 0.1040         | 0.0609         | 0.0356                      |
| CO    | 5758736    | 0.1202                              | 0.1279         | 0.1462         | 0.1502         | 0.1286         | 0.1246         | 0.1109         | 0.0609         | 0.0304                      |
| CT    | 3565287    | 0.1061                              | 0.1287         | 0.1304         | 0.1233         | 0.1233         | 0.1482         | 0.1211         | 0.0730         | 0.0460                      |
| DE    | 973764     | 0.1148                              | 0.1220         | 0.1296         | 0.1250         | 0.1148         | 0.1374         | 0.1306         | 0.0843         | 0.0414                      |
| FL    | 21477737   | 0.1080                              | 0.1133         | 0.1271         | 0.1254         | 0.1222         | 0.1345         | 0.1247         | 0.0920         | 0.0529                      |
| GA    | 10617423   | 0.1277                              | 0.1384         | 0.1411         | 0.1341         | 0.1317         | 0.1307         | 0.1050         | 0.0622         | 0.0290                      |
| HI    | 1415872    | 0.1229                              | 0.1120         | 0.1372         | 0.1379         | 0.1191         | 0.1238         | 0.1214         | 0.0766         | 0.0490                      |
| ID    | 1787065    | 0.1364                              | 0.1457         | 0.1334         | 0.1297         | 0.1176         | 0.1179         | 0.1145         | 0.0706         | 0.0341                      |
| IL    | 12671821   | 0.1208                              | 0.1293         | 0.1375         | 0.1350         | 0.1258         | 0.1326         | 0.1136         | 0.0660         | 0.0394                      |
| IN    | 6732219    | 0.1268                              | 0.1351         | 0.1390         | 0.1262         | 0.1218         | 0.1303         | 0.1155         | 0.0674         | 0.0379                      |
| IA    | 3155070    | 0.1265                              | 0.1339         | 0.1369         | 0.1253         | 0.1141         | 0.1277         | 0.1192         | 0.0700         | 0.0463                      |
| KS    | 2913314    | 0.1329                              | 0.1376         | 0.1402         | 0.1298         | 0.1145         | 0.1239         | 0.1140         | 0.0656         | 0.0415                      |
| KY    | 4467673    | 0.1236                              | 0.1282         | 0.1369         | 0.1248         | 0.1241         | 0.1341         | 0.1196         | 0.0718         | 0.0368                      |
| LA    | 4648794    | 0.1306                              | 0.1295         | 0.1402         | 0.1367         | 0.1170         | 0.1288         | 0.1152         | 0.0669         | 0.0352                      |
| ME    | 1344212    | 0.0985                              | 0.1125         | 0.1163         | 0.1179         | 0.1195         | 0.1506         | 0.1469         | 0.0891         | 0.0486                      |
| MD    | 6045680    | 0.1216                              | 0.1258         | 0.1316         | 0.1363         | 0.1264         | 0.1413         | 0.1138         | 0.0664         | 0.0369                      |
| MA    | 6892503    | 0.1058                              | 0.1224         | 0.1452         | 0.1340         | 0.1223         | 0.1406         | 0.1179         | 0.0695         | 0.0423                      |
| MI    | 9986857    | 0.1159                              | 0.1274         | 0.1390         | 0.1202         | 0.1194         | 0.1377         | 0.1259         | 0.0735         | 0.0410                      |
| MN    | 5639632    | 0.1276                              | 0.1298         | 0.1313         | 0.1369         | 0.1182         | 0.1336         | 0.1166         | 0.0657         | 0.0404                      |
| MS    | 2976149    | 0.1267                              | 0.1382         | 0.1393         | 0.1255         | 0.1204         | 0.1283         | 0.1154         | 0.0698         | 0.0363                      |
| MO    | 6137428    | 0.1225                              | 0.1279         | 0.1364         | 0.1292         | 0.1175         | 0.1325         | 0.1194         | 0.0728         | 0.0417                      |
| MT    | 1068778    | 0.1187                              | 0.1217         | 0.1352         | 0.1259         | 0.1110         | 0.1279         | 0.1370         | 0.0805         | 0.0420                      |
| NE    | 1934408    | 0.1375                              | 0.1374         | 0.1377         | 0.1325         | 0.1144         | 0.1222         | 0.1124         | 0.0645         | 0.0414                      |
| NV    | 3080156    | 0.1244                              | 0.1246         | 0.1350         | 0.1413         | 0.1298         | 0.1279         | 0.1129         | 0.0728         | 0.0312                      |
| NH    | 1359711    | 0.0983                              | 0.1189         | 0.1294         | 0.1202         | 0.1214         | 0.1558         | 0.1360         | 0.0778         | 0.0422                      |
| NJ    | 8882190    | 0.1181                              | 0.1253         | 0.1273         | 0.1296         | 0.1302         | 0.1437         | 0.1150         | 0.0687         | 0.0421                      |
| NM    | 2096829    | 0.1236                              | 0.1331         | 0.1371         | 0.1297         | 0.1129         | 0.1245         | 0.1224         | 0.0769         | 0.0398                      |
| NY    | 19453561   | 0.1156                              | 0.1180         | 0.1427         | 0.1364         | 0.1228         | 0.1368         | 0.1153         | 0.0692         | 0.0432                      |
| NC    | 10488084   | 0.1192                              | 0.1299         | 0.1374         | 0.1274         | 0.1285         | 0.1326         | 0.1162         | 0.0723         | 0.0364                      |
| ND    | 762062     | 0.1380                              | 0.1249         | 0.1641         | 0.1362         | 0.1049         | 0.1174         | 0.1100         | 0.0604         | 0.0440                      |
| OH    | 11689100   | 0.1200                              | 0.1283         | 0.1339         | 0.1251         | 0.1197         | 0.1346         | 0.1236         | 0.0723         | 0.0423                      |
| OK    | 3956971    | 0.1340                              | 0.1355         | 0.1406         | 0.1328         | 0.1170         | 0.1225         | 0.1110         | 0.0690         | 0.0375                      |
| OR    | 4217737    | 0.1138                              | 0.1184         | 0.1357         | 0.1403         | 0.1264         | 0.1237         | 0.1259         | 0.0770         | 0.0388                      |
| PA    | 12801989   | 0.1115                              | 0.1222         | 0.1316         | 0.1260         | 0.1182         | 0.1388         | 0.1270         | 0.0765         | 0.0482                      |
| RI    | 1059361    | 0.1033                              | 0.1232         | 0.1447         | 0.1279         | 0.1182         | 0.1421         | 0.1229         | 0.0715         | 0.0463                      |
| SC    | 5148714    | 0.1177                              | 0.1266         | 0.1350         | 0.1250         | 0.1211         | 0.1320         | 0.1251         | 0.0808         | 0.0367                      |
| SD    | 884659     | 0.1393                              | 0.1344         | 0.1341         | 0.1285         | 0.1078         | 0.1237         | 0.1225         | 0.0664         | 0.0432                      |
| TN    | 6829174    | 0.1210                              | 0.1264         | 0.1386         | 0.1287         | 0.1256         | 0.1324         | 0.1177         | 0.0733         | 0.0364                      |
| TX    | 28995881   | 0.1419                              | 0.1437         | 0.1449         | 0.1431         | 0.1289         | 0.1191         | 0.0957         | 0.0546         | 0.0282                      |
| UT    | 3205958    | 0.1620                              | 0.1632         | 0.1607         | 0.1421         | 0.1189         | 0.0964         | 0.0836         | 0.0482         | 0.0249                      |
| VT    | 623989     | 0.0973                              | 0.1214         | 0.1337         | 0.1168         | 0.1158         | 0.1451         | 0.1423         | 0.0835         | 0.0441                      |
| VA    | 8535519    | 0.1204                              | 0.1257         | 0.1389         | 0.1367         | 0.1273         | 0.1351         | 0.1123         | 0.0683         | 0.0354                      |
| WA    | 7614893    | 0.1234                              | 0.1207         | 0.1421         | 0.1460         | 0.1249         | 0.1262         | 0.1156         | 0.0670         | 0.0341                      |
| WV    | 1792147    | 0.1087                              | 0.1172         | 0.1255         | 0.1168         | 0.1241         | 0.1361         | 0.1386         | 0.0872         | 0.0458                      |
| WI    | 5822434    | 0.1177                              | 0.1286         | 0.1325         | 0.1264         | 0.1179         | 0.1395         | 0.1245         | 0.0708         | 0.0421                      |
| WY    | 578759     | 0.1277                              | 0.1305         | 0.1330         | 0.1351         | 0.1144         | 0.1242         | 0.1282         | 0.0706         | 0.0364                      |
| DC    | 705749     | 0.1185                              | 0.0932         | 0.1936         | 0.2039         | 0.1171         | 0.1044         | 0.0877         | 0.0506         | 0.0310                      |
| PR    | 3193694    | 0.0907                              | 0.1221         | 0.1358         | 0.1166         | 0.1267         | 0.1360         | 0.1242         | 0.0937         | 0.0541                      |

**Table S6.** State-wise medical resources

| State | Number of hospital beds | Number of ICU beds |
|-------|-------------------------|--------------------|
| AL    | 14793                   | 1903               |
| AK    | 1583                    | 130                |
| AZ    | 12590                   | 1702               |
| AR    | 8560                    | 908                |
| CA    | 68074                   | 8105               |
| CO    | 10335                   | 1295               |
| CT    | 7034                    | 741                |
| DE    | 1845                    | 237                |
| FL    | 53744                   | 6433               |
| GA    | 21861                   | 2582               |
| HI    | 2623                    | 219                |
| ID    | 2265                    | 230                |
| IL    | 25846                   | 3106               |
| IN    | 17546                   | 2351               |
| IA    | 9152                    | 634                |
| KS    | 5894                    | 554                |
| KY    | 11915                   | 1331               |
| LA    | 14484                   | 1572               |
| ME    | 3618                    | 309                |
| MD    | 8710                    | 1053               |
| MA    | 13352                   | 1521               |
| MI    | 24112                   | 2724               |
| MN    | 12610                   | 1297               |
| MS    | 10166                   | 761                |
| MO    | 22788                   | 2604               |
| MT    | 4371                    | 277                |
| NE    | 6064                    | 565                |
| NV    | 6051                    | 1167               |
| NH    | 2542                    | 242                |
| NJ    | 19999                   | 1806               |
| NM    | 2908                    | 380                |
| NY    | 50102                   | 4308               |
| NC    | 22158                   | 3294               |
| ND    | 4710                    | 310                |
| OH    | 27969                   | 3635               |
| OK    | 10459                   | 1144               |
| OR    | 7649                    | 973                |
| PA    | 34689                   | 3846               |
| RI    | 2249                    | 293                |
| SC    | 10313                   | 1358               |
| SD    | 4943                    | 149                |
| TN    | 21489                   | 2601               |
| TX    | 55629                   | 7128               |
| UT    | 5690                    | 758                |
| VT    | 1743                    | 117                |
| VA    | 16782                   | 1902               |
| WA    | 11618                   | 1428               |
| WV    | 5736                    | 601                |
| WI    | 11350                   | 1533               |
| WY    | 633                     | 32                 |
| DC    | 5055                    | 601                |
| PR    | NA                      | NA                 |

## References and Notes:

1. D. Brockmann, D. Helbing, The hidden geometry of complex, network-driven contagion phenomena. *Science* **342**, 1337-1342 (2013).
2. Air Carrier Statistics. Bureau of Transportation Statistics.  
[https://www.transtats.bts.gov/Tables.asp?DB\\_ID=111](https://www.transtats.bts.gov/Tables.asp?DB_ID=111)
3. E. Zagheni, F. C. Billari, P. Manfredi, A. Melegaro, J. Mossong, W. J. Edmunds, Using time-use data to parameterize models for the spread of close-contact infectious diseases. *Am. J. Epidemiol.* **168**, 1082-1090 (2008).
4. N. Ferguson, D. Laydon, G. Nedjati Gilani, N. Imai, K. Ainslie, K., et al., Report 9: Impact of non-pharmaceutical interventions (NPIs) to reduce COVID19 mortality and healthcare demand. (2020). <https://spiral.imperial.ac.uk/handle/10044/1/77482>
5. United State Census Bureau. <https://www.census.gov/data/datasets/time-series/demo/popest/2010s-state-total.html>
6. Harvard Global Health Institute. <https://globalepidemics.org/our-data/hospital-capacity/>
